# Supplementary material for: Pancreatic Progenitor Commitment Is Marked by an Increase in Ink4a/Arf Expression
Source: Biomolecules. 2021 Jul 30;11(8):1124. doi: 10.3390/biom11081124 (PMC8392192; doi:10.3390/biom11081124)

## **SUPPLEMENTARY INFORMATION**

**Pancreatic progenitor commitment is marked by  
an increase in *Ink4a/Arf* expression**

**Figure S1.** Full-length western blots images of cropped immunoblots in Figure 2B. Blue dashed squares correspond to the bands showed in the ultimate panel in the manuscript.

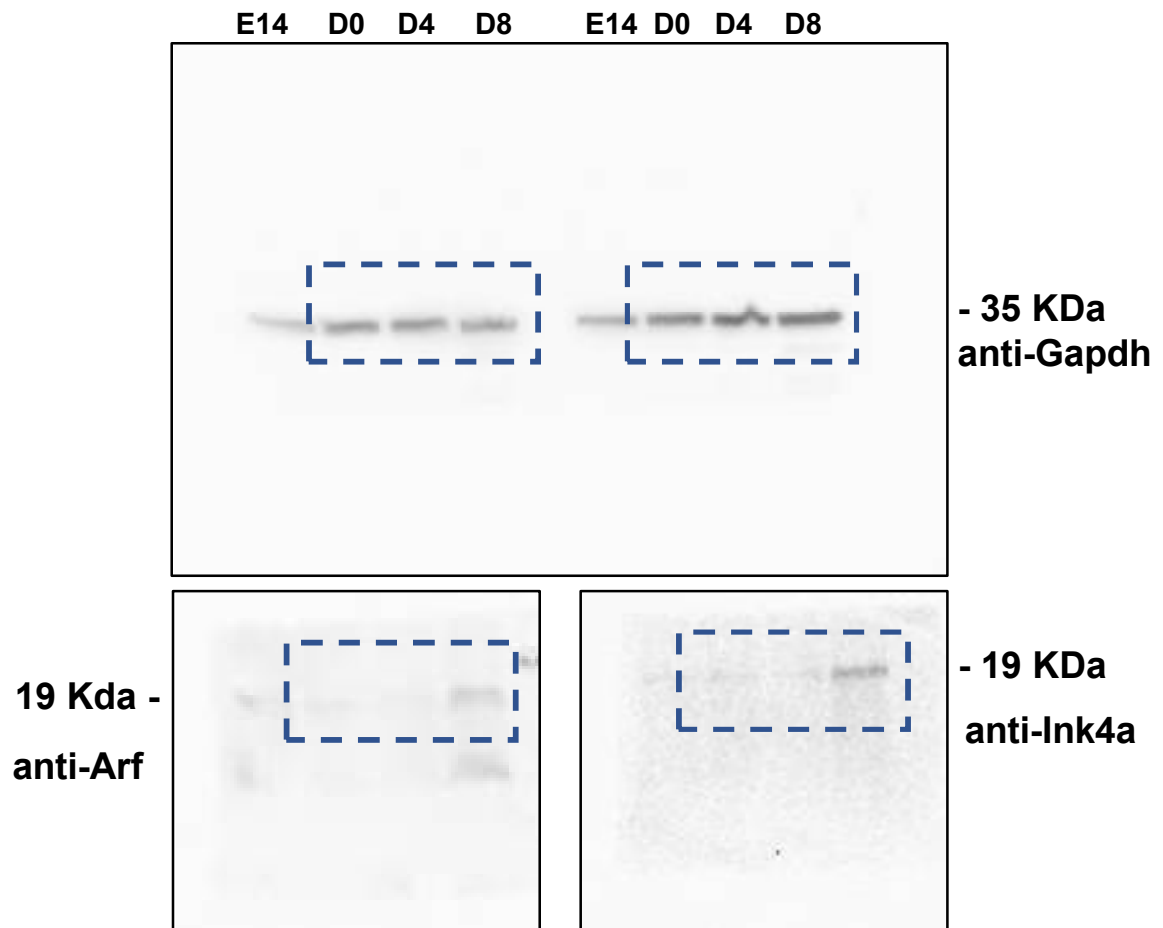

**Figure S2.** Immunofluorescence assays for Ink4 and Arf subcellular localization. ESCs (D0) were induced to differentiate into PPCs (D8) and subjected to immunofluorescence with Ink4a and Arf antibodies (*green*), actin (*red*) for cytoplasm and DAPI (*blue*) for nucleus staining. The merge images were cropped (as in Figure 2C) and stained using Fiji (ImageJ) program.

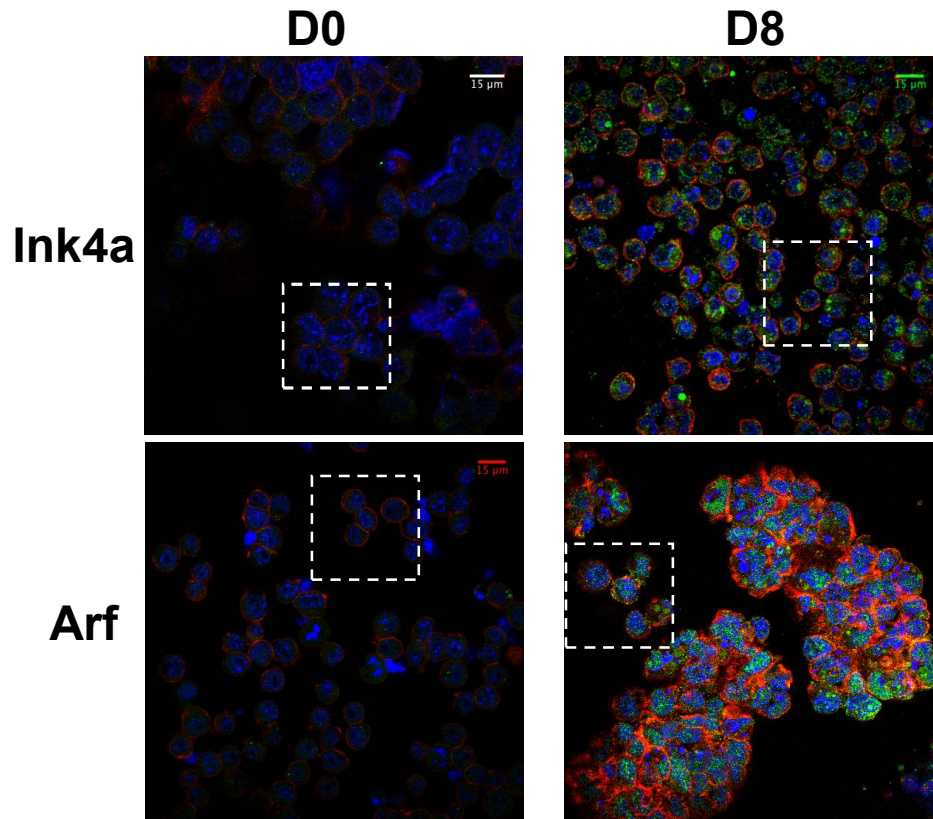

**Figure S3.** Ink4A and Arf protein differentially expressed in PPCs. Full-length western blots images with cropped in Figure 2D, anti-Ink4a and anti-Arf antibodies were used for our protein staining, anti-Parp was used as nuclear and anti-Gapdh as cytoplasmic markers, respectively.

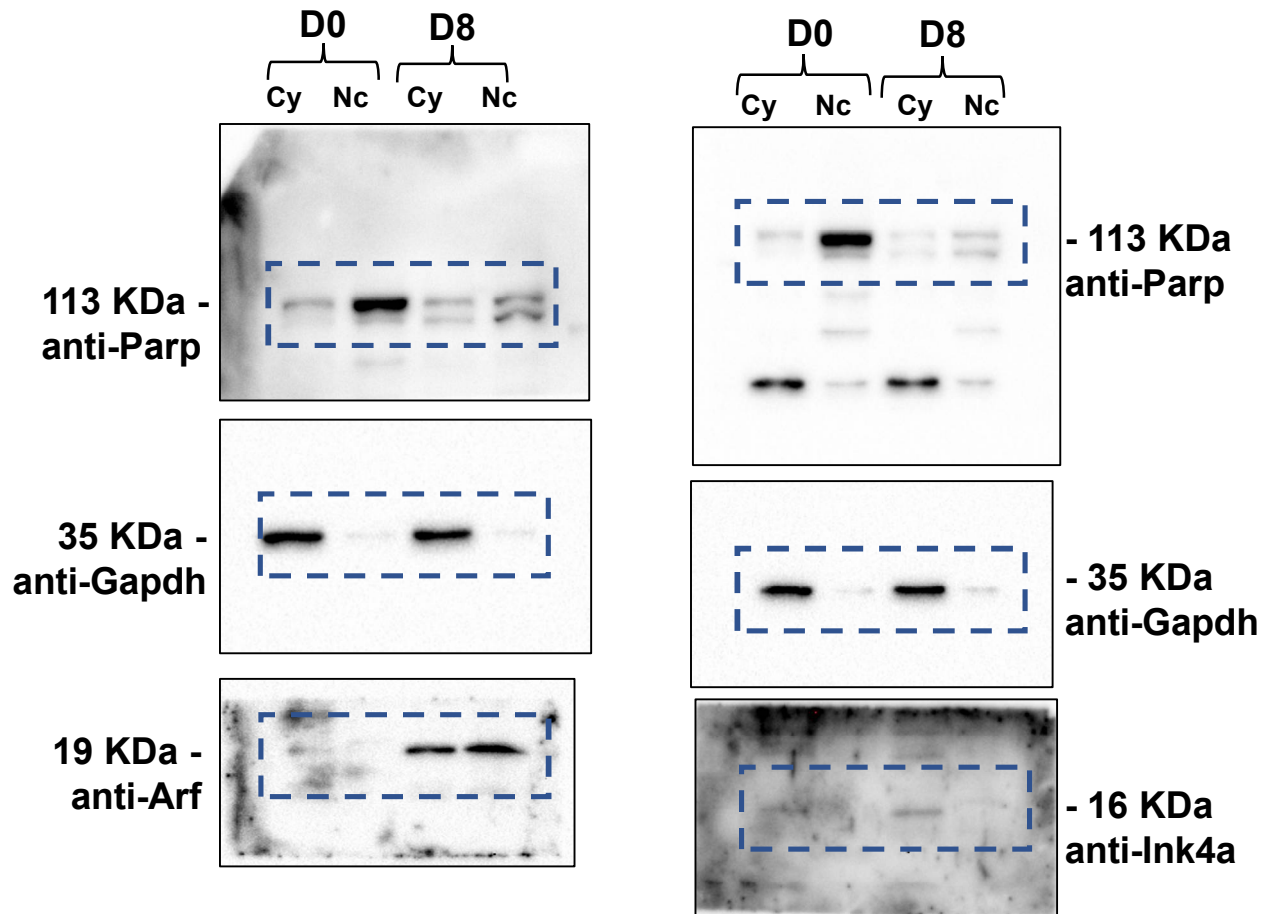

**Figure S4.** Full-length western blots images of cropped immunoblots of Figure 4C. Blue dashed squares correspond to the bands showed in the ultimate panel in the manuscript. DMSO: negative control.

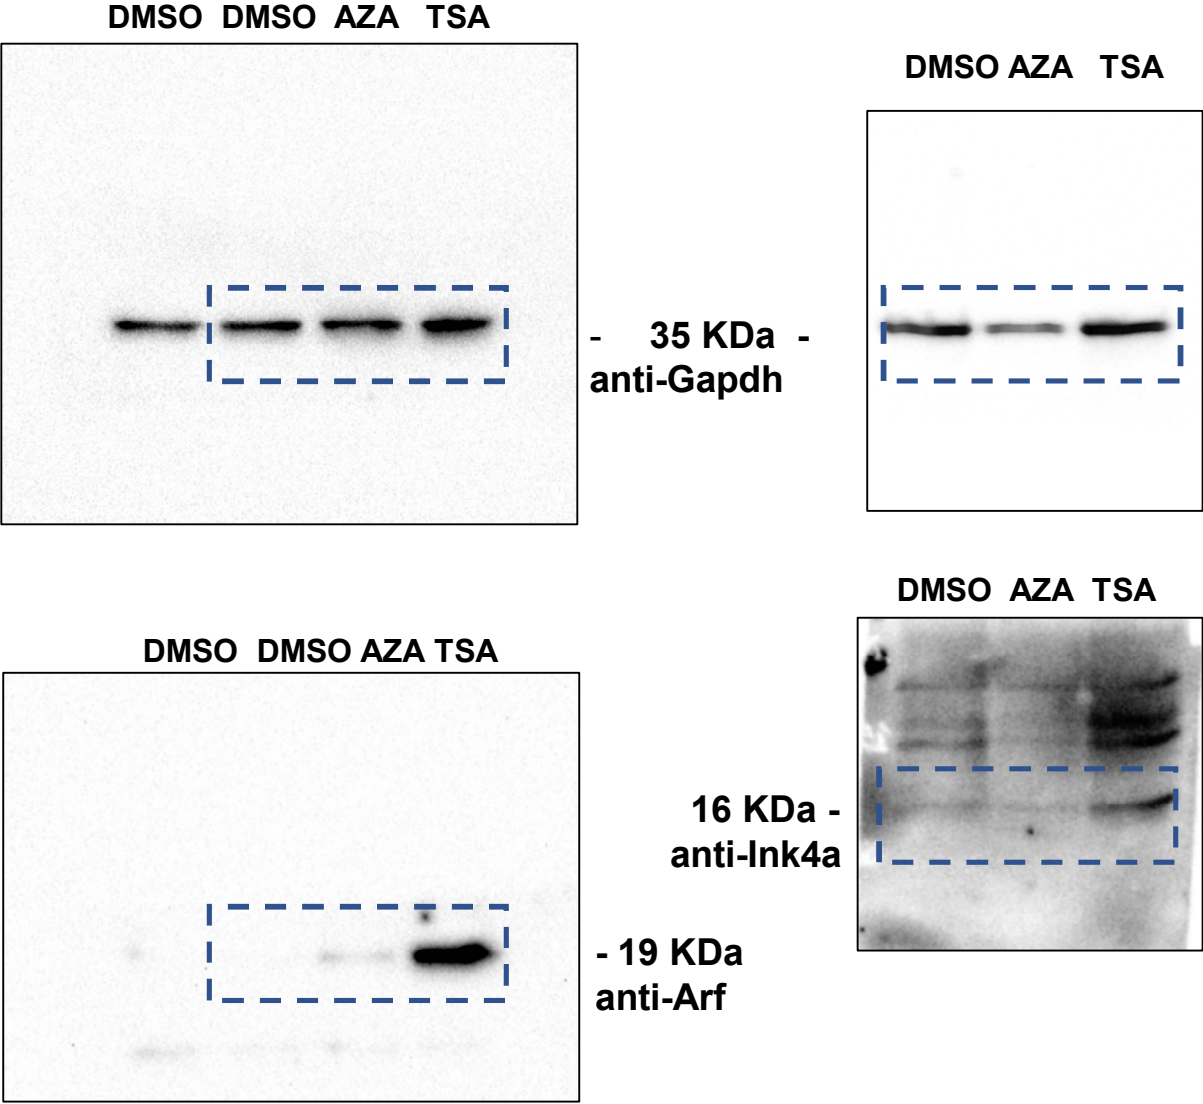

Supplement: Supplementary file 1 [file biomolecules-11-01124-s001.zip › biomolecules-1161528-supplementary.pdf]
